# Supplementary material for: Asymmetric total synthesis of polycyclic xanthenes and discovery of a WalK activator active against MRSA
Source: PubMed Central journal article supplement (PMC11245619; doi:10.1038/s41467-024-49629-8), 2024-07-13
Supplement: 41467_2024_49629_MOESM3_ESM.pdf [file 41467_2024_49629_MOESM3_ESM.pdf]

## Description of Additional Supplementary Files

**Supplementary Data 1:** Coordinates of all located intermediates and transition structures
